# Supplementary material for: Reciprocal expression of Annexin A6 and RasGRF2 discriminates rapidly growing from invasive triple negative breast cancer subsets
Source: PubMed Central journal article supplement (PMC7162501; doi:10.1371/journal.pone.0231711), 2020-04-16
Supplement: pone.0231711.s001.pdf [file pone.0231711.s001.pdf]

Fig 1A

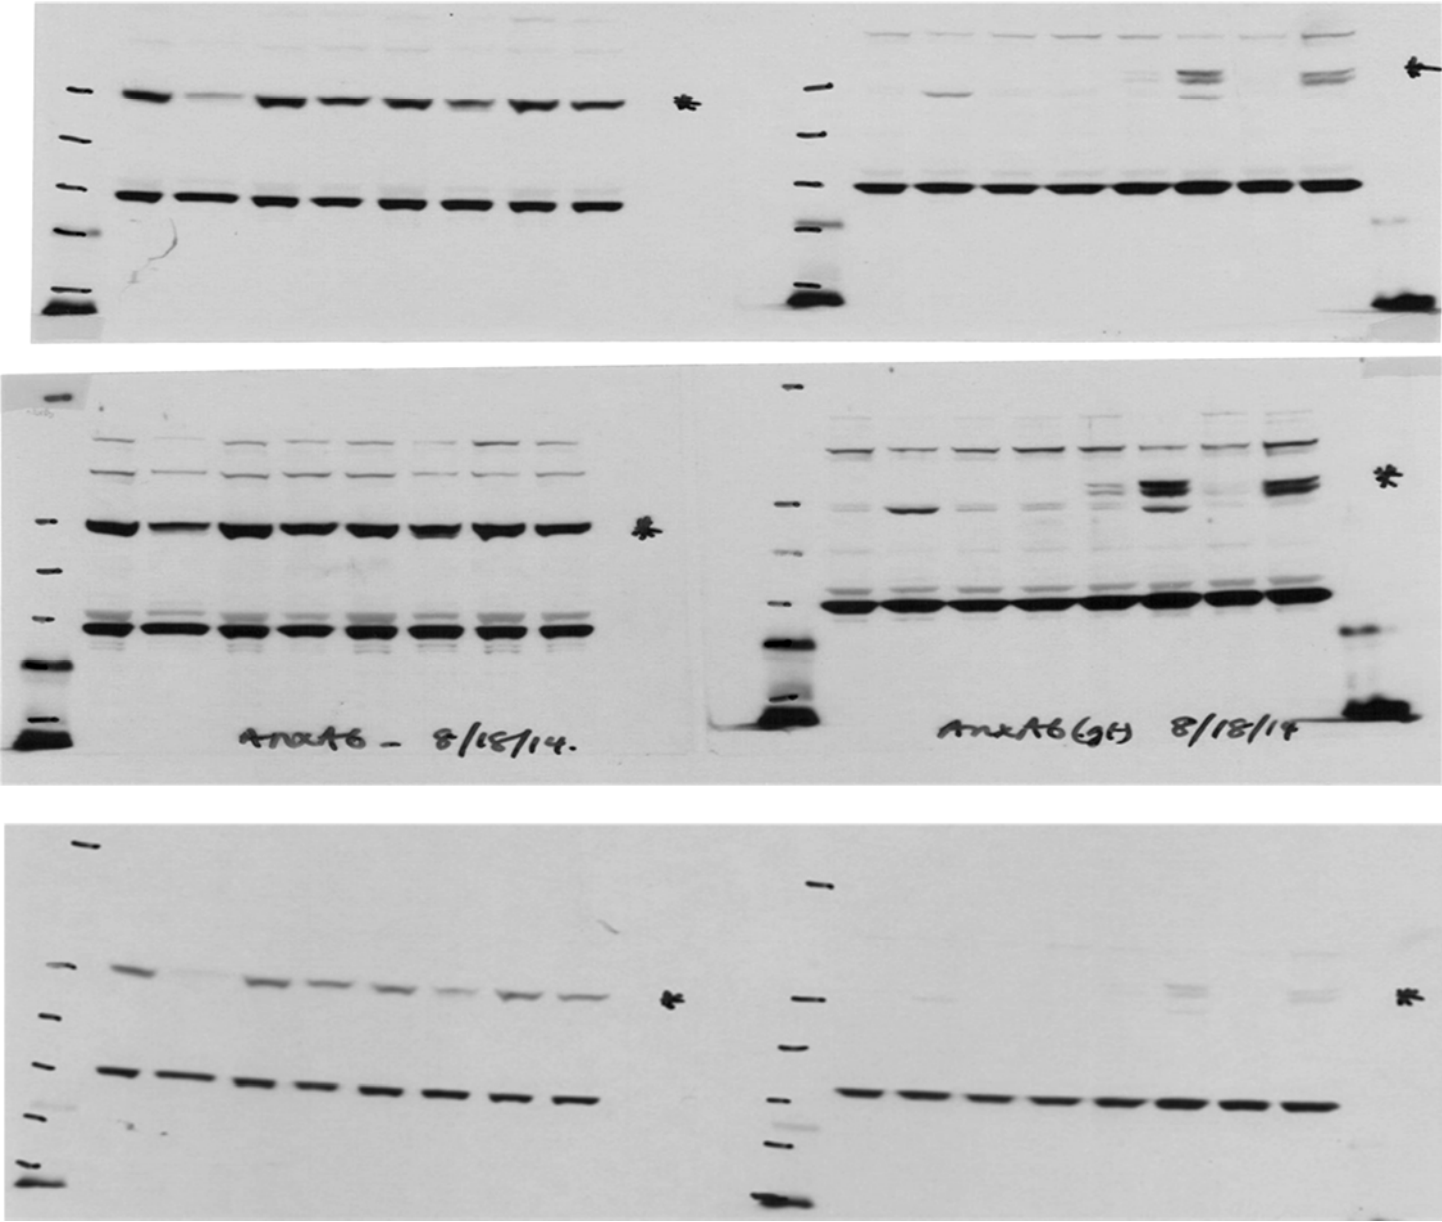

Fig 1C and D

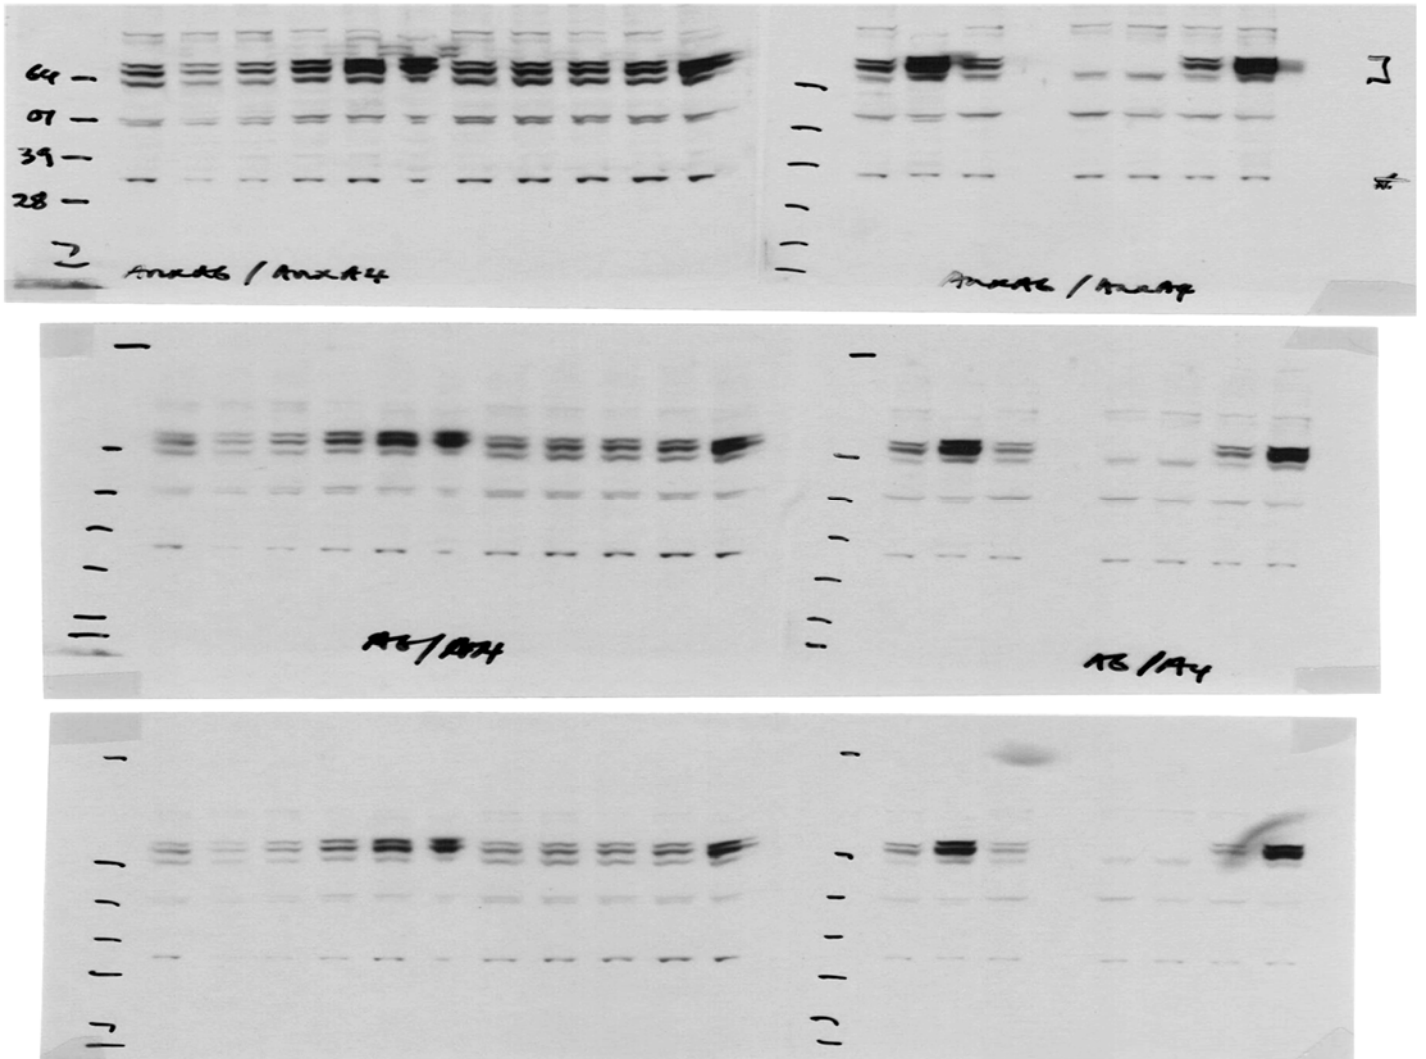

Fig 1C and D

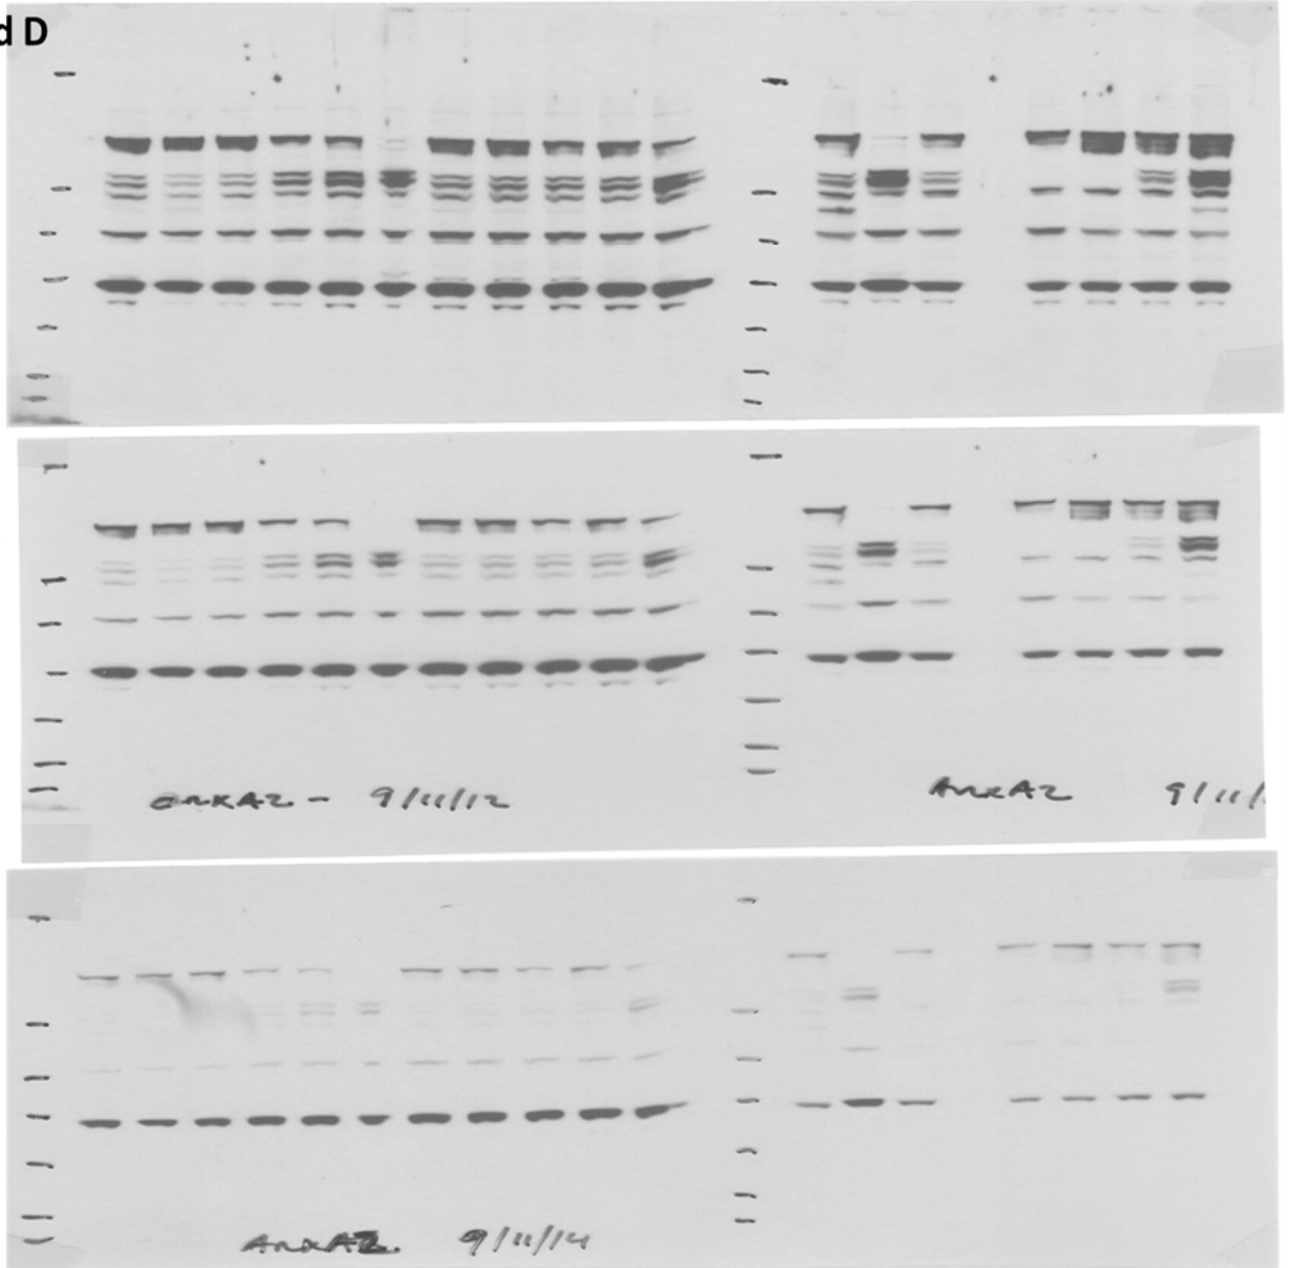

Fig 1E

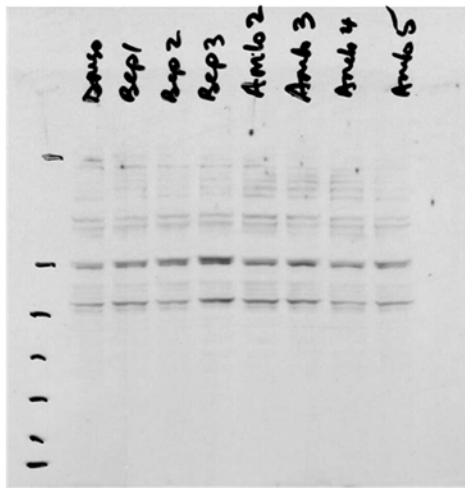

AnxA6

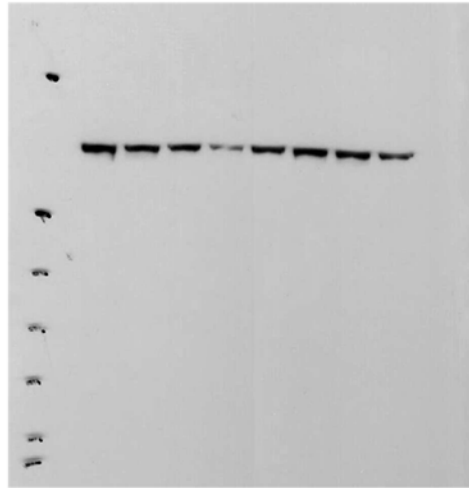

RasGRF2

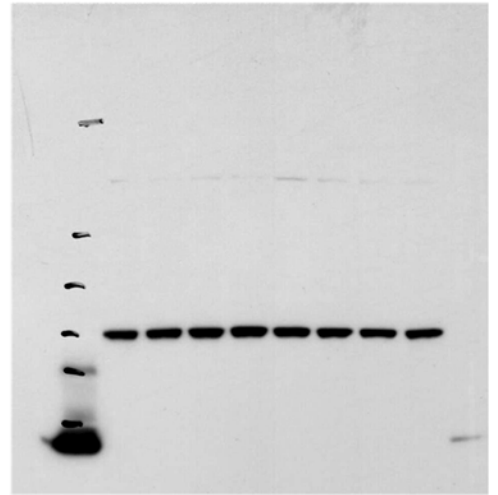

GAPDH

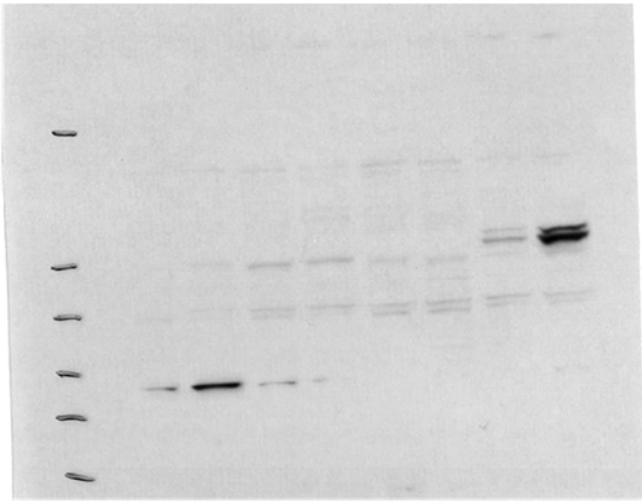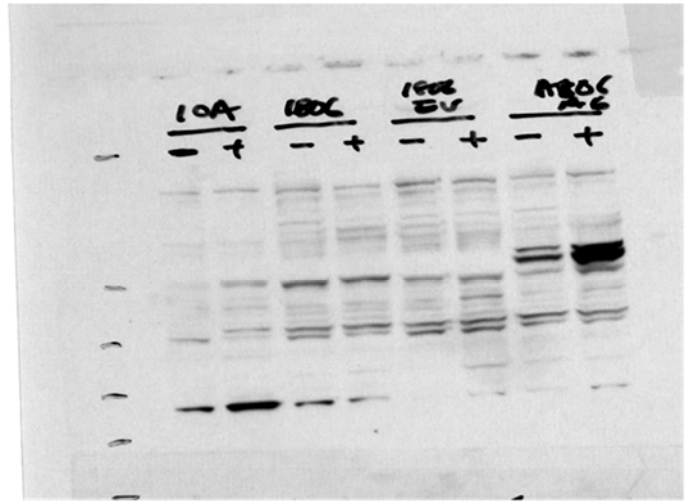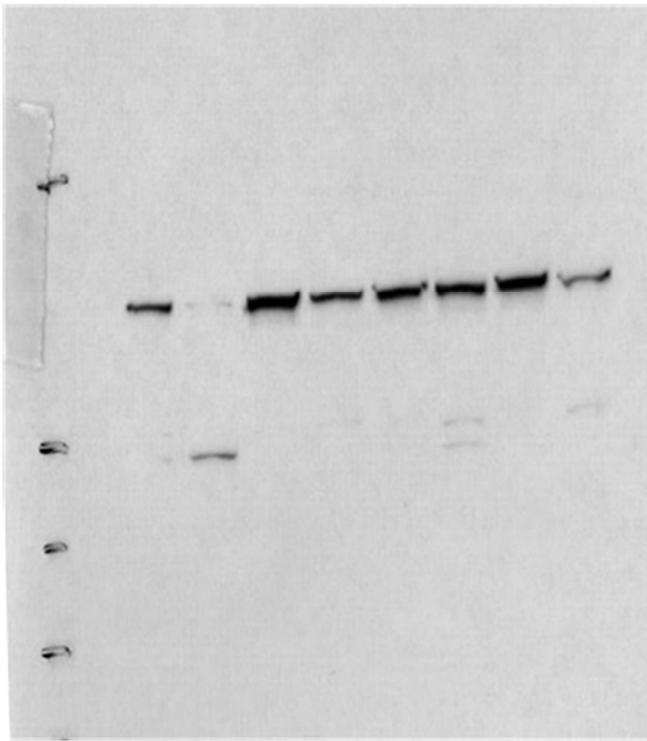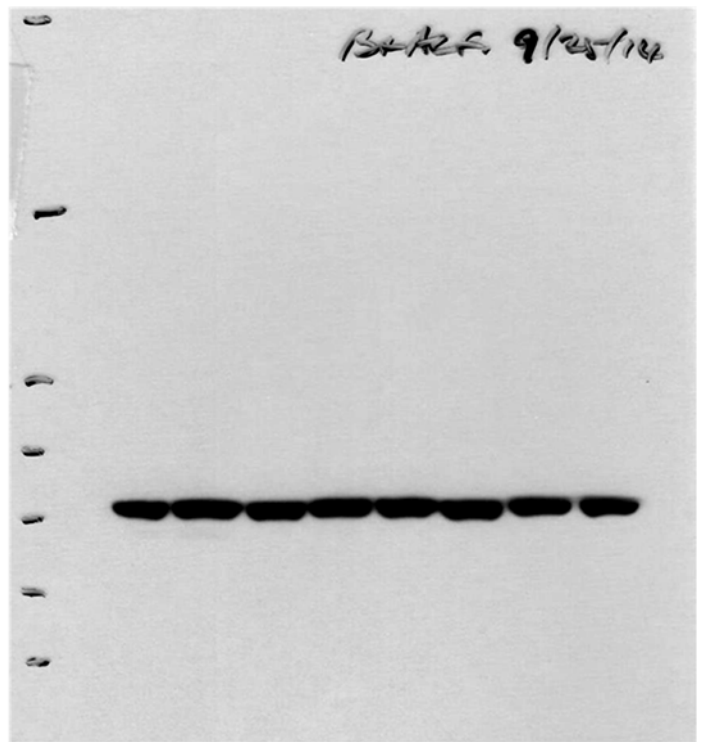

Supplementary Fig. S1A

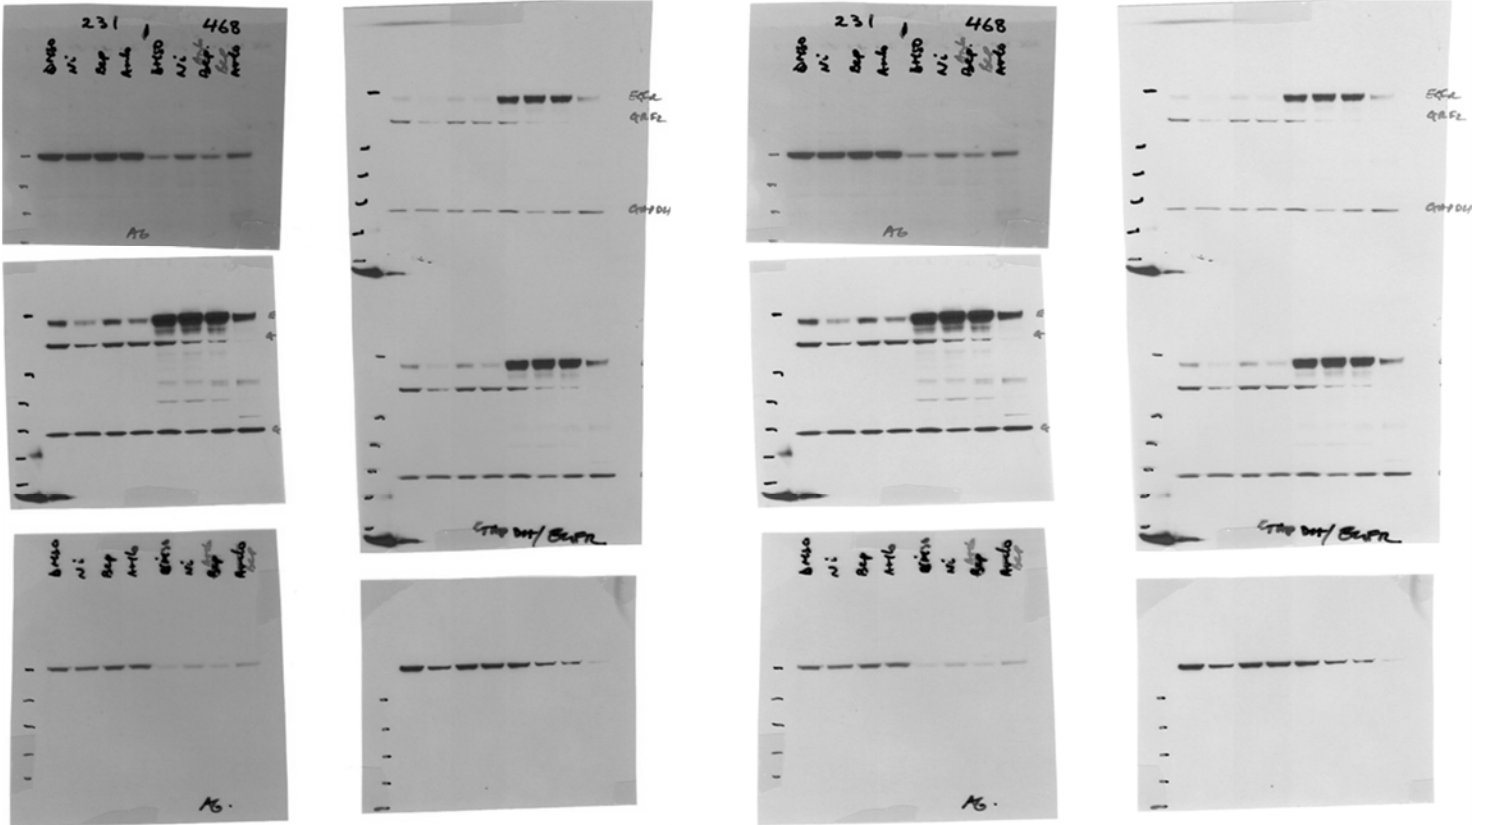

Supplementary Fig. S1B
